# Supplementary material
Source: Springer Nature journal article supplement (https://www.springermedizin.de/resource/supplementary/12885_2011_3087_MOESM1_ESM.pdf/9464242)

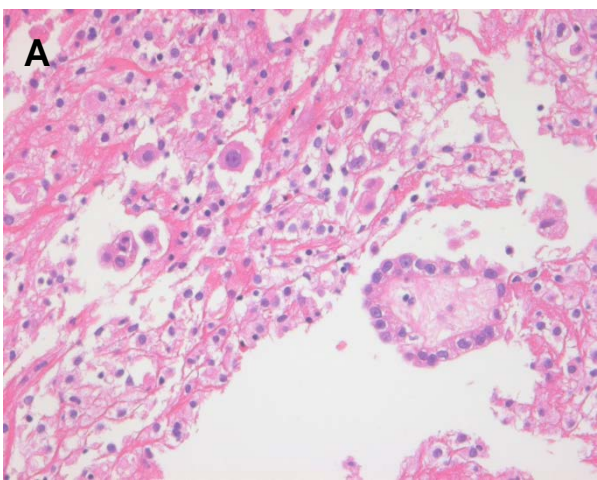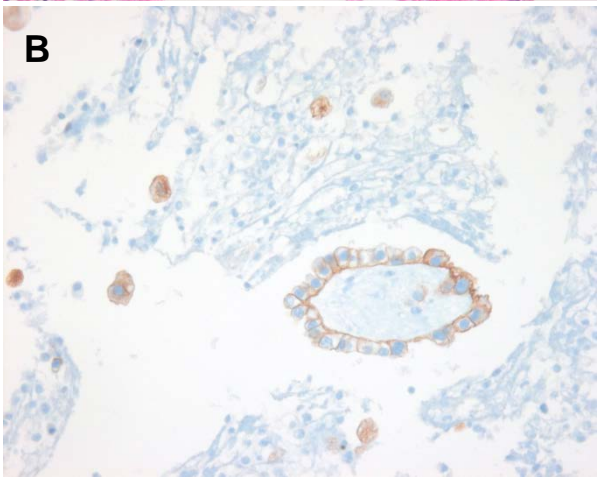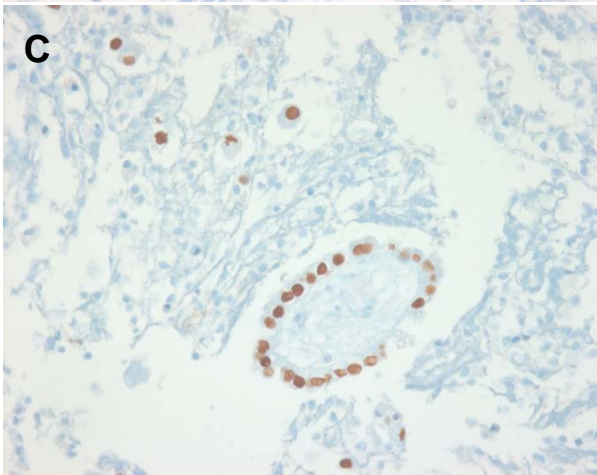

Supplement: MOESM1 [file 9464242]
